# Supplementary material for: Competence of radiologists in cardiac CT and MR imaging in Europe: insights from the ESCR Registry
Source: PubMed Central journal article supplement (PMC11364788; doi:10.1007/s00330-024-10644-4), 2024-02-28
Supplement: 330_2024_10644_MOESM1_ESM.pdf [file 330_2024_10644_MOESM1_ESM.pdf]

Competence of Radiologists in Cardiac CT and MR Imaging in Europe: Insights from the  
ESCR Registry

ELECTRONIC SUPPLEMENTARY MATERIAL

Table S1: Data collected in ESCR registry for CT and MRI

| <b>CT</b>                                | <b>MRI</b>                               |
|------------------------------------------|------------------------------------------|
| Date of Examination                      | Date of Examination                      |
| Age                                      | Age                                      |
| Gender                                   | Gender                                   |
| Body Weight                              | Body Weight                              |
| Height                                   | Height                                   |
| <b>Indications</b>                       |                                          |
| Suspected CAD                            | Suspected CAD                            |
| Known CAD                                | Known CAD                                |
| Known CAD/single vessel disease          | Known CAD/single vessel disease          |
| Known CAD/multi vessel disease           | Known CAD/multi vessel disease           |
| Known CAD/Hx of myocardial infarction    | Known CAD/Hx of myocardial infarction    |
| Known CAD/Hx of Cardiac Catheterization  | Known CAD/Hx of Cardiac Catheterization  |
| Known CAD/Hx of CABG                     | Known CAD/Hx of CABG                     |
| Known CAD/Hx of PCI or Stenting          | Known CAD/Hx of PCI or Stenting          |
| Suspected HTx Rejection                  | Suspected HTx Rejection                  |
| Suspected HTx Allograft Vasculopathy     | Suspected HTx Allograft Vasculopathy     |
| Visualisation of Pulmonary Veins         | Visualisation of Pulmonary Veins         |
| Visualisation of Coronary Veins          | Visualisation of Coronary Veins          |
| Diagnosis/Coronary Anomaly or Fistula    | Diagnosis/Coronary Anomaly or Fistula    |
| Diagnosis/CABG or IMA-Graft-Patency      | Diagnosis/CABG or IMA-Graft-Patency      |
| Diagnosis/Pericardial Disease            | Diagnosis/Pericardial Disease            |
| Diagnosis/Triple-Rule-Out                |                                          |
| Diagnosis/Viability Assessment           | Diagnosis/Viability Assessment           |
| Diagnosis/Pre-TAVI                       | Diagnosis/Pre-TAVI                       |
| Diagnosis/Post-TAVI                      | Diagnosis/Post-TAVI                      |
| Suspected Cardiomyopathy                 | Suspected Cardiomyopathy                 |
| Known Cardiomyopathy                     | Known Cardiomyopathy                     |
| Suspected Myocarditis                    | Suspected Myocarditis                    |
| Known Myocarditis                        | Known Myocarditis                        |
| Suspected Valve Disease                  | Suspected Valve Disease                  |
| Known Valve Disease                      | Known Valve Disease                      |
| Suspected Cardiac Tumor                  | Suspected Cardiac Tumour                 |
| Known Cardiac Tumor                      | Known Cardiac Tumour                     |
| Suspected Congenital Heart Disease (CHD) | Suspected Congenital Heart Disease (CHD) |
| Other Suspected Congenital Heart Disease | Other Suspected Congenital Heart Disease |
| Known Congenital Heart Disease (CHD)/    | Known Congenital Heart Disease (CHD)/    |
| Other Known Congenital Heart Disease     | Other Known Congenital Heart Disease     |
| Others Indications                       | Other Indications                        |

| <b>Adverse Events</b>                                                       |                                                                             |
|-----------------------------------------------------------------------------|-----------------------------------------------------------------------------|
| Complications - Adverse Events (AE)                                         | Complications - Adverse Events (AE)                                         |
| Complications - Adverse Events (AE)/extravasation injury                    | Complications - Adverse Events (AE)/extravasation injury                    |
| Complications - Adverse Events (AE)/hypersensitive reaction to contrast ... | Complications - Adverse Events (AE)/hypersensitive reaction to contrast ... |
| Complications - Adverse Events (AE)/dyspnoea                                | Complications - Adverse Events (AE)/dyspnoea                                |
| Complications - Adverse Events (AE)/pulmonary oedema                        | Complications - Adverse Events (AE)/pulmonary oedema                        |
| Complications - Adverse Events (AE)/severe allergic reaction                | Complications - Adverse Events (AE)/severe allergic reaction                |
| Complications - Adverse Events (AE)/symptomatic bradycardia                 | Complications - Adverse Events (AE)/symptomatic bradycardia                 |
| Complications - Adverse Events (AE)/symptomatic hypotension                 | Complications - Adverse Events (AE)/symptomatic hypotension                 |
| Complications - Adverse Events (AE)/renal failure                           | Complications - Adverse Events (AE)/renal failure                           |
| Complications - Adverse Events (AE)/thyreotoxicosis                         | Complications - Adverse Events (AE)/thyreotoxicosis                         |
| Complications - Adverse Events (AE)/resuscitation                           | Complications - Adverse Events (AE)/resuscitation                           |
| Complications - Adverse Events (AE)/heating                                 | Complications - Adverse Events (AE)/heating                                 |
| Complications - Adverse Events (AE)/accidentally Pacemaker/ICD detected     | Complications - Adverse Events (AE)/accidentally Pacemaker/ICD detected     |
| Complications - Adverse Events (AE)/other                                   | Complications - Adverse Events (AE)/Others                                  |
| Other Complications - Adverse Events                                        | Other Complications - Adverse Events                                        |
| <b>Premedication</b>                                                        |                                                                             |
| Premedication for/during CT                                                 | Premedication for/during MR                                                 |
| Premedication for/during CT/sedation                                        | Premedication for/during MR/sedation                                        |
| Premedication for/during CT/nitrates                                        | Premedication for/during MR/nitrates                                        |
| Premedication for/during CT/beta-blocker i.v.                               | Premedication for/during MR/beta-blocker i.v.                               |
| Premedication for/during CT/beta-blocker orally                             | Premedication for/during MR/beta-blocker orally                             |
| Premedication for/during CT/ivabradine                                      | Premedication for/during MR/ivabradine                                      |
| Premedication for/during CT/Ca-channel blocker                              | Premedication for/during MR/Ca-channel blocker                              |
| Premedication for/during CT/premedication for contrast allergy              | Premedication for/during MR/premedication for contrast allergy              |
| Premedication for/during CT/adenosine for perfusion study                   | MR-Perfusionstudy (Stress-Adenosine)                                        |
| Premedication for/during CT/dobutamine for perfusion study                  | MR-Perfusionstudy (Stress-Regadenoson)                                      |
| Premedication for/during CT/sodiumperchlorate                               | MR-Perfusionstudy (Stress-Dobutamin)                                        |

Premedication for/during CT/other  
Mean Heart Rate  
Heart Rhythm (during scan)  
Other Heart Rhythm (during scan)

Premedication for/during MR/others  
Mean Heart Rate  
Heart Rhythm (during scan)  
Other Heart Rhythm (during scan)

**Reporting**

Reporter  
Other Reporter  
Role

Reporter  
Other Reporter  
Role
